# Supplementary material for: Metabolite Analysis of Toosendanin by an Ultra-High Performance Liquid Chromatography-Quadrupole-Time of Flight Mass Spectrometry Technique
Source: MDPI journal article supplement (doi:10.3390/molecules181012144), 2013-09-30

# Supplementary Materials

**Figure S1.** MS (A) and MS/MS spectra (B) of toosendanin in positive mode.

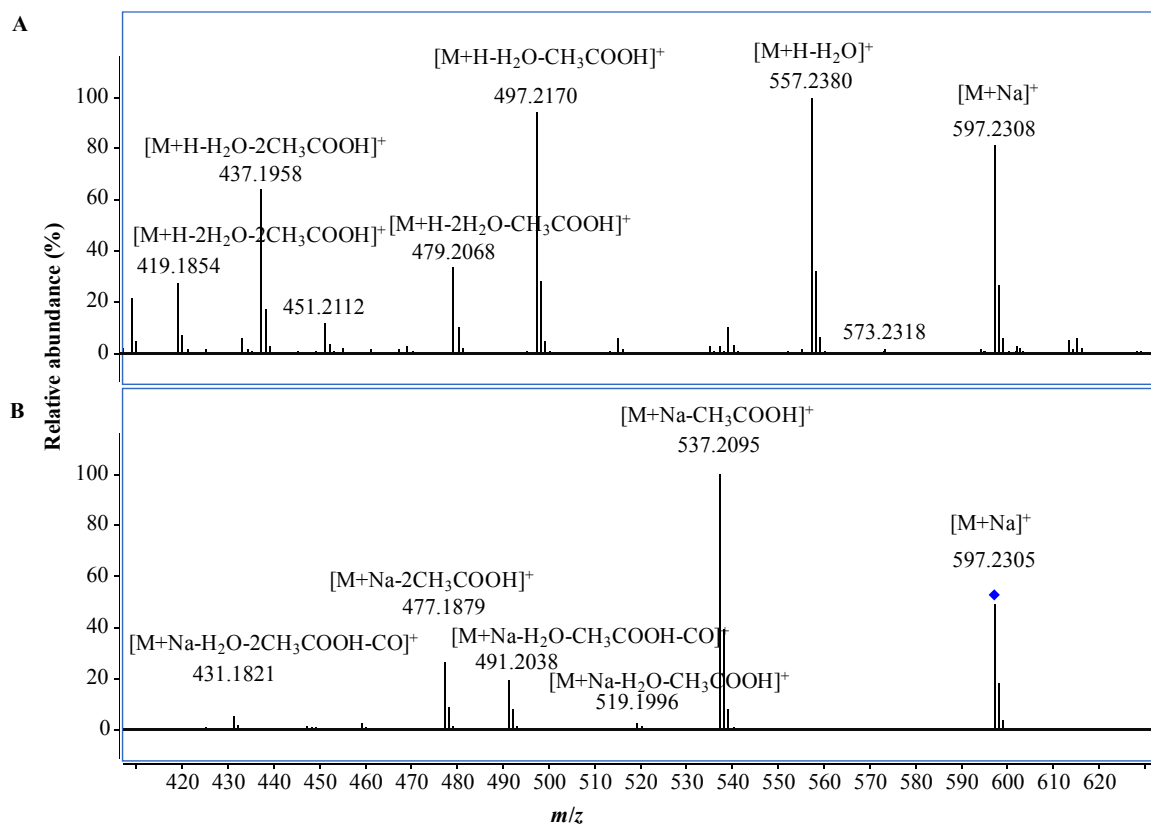

**Figure S2.** Amount-time relationship of toosendanin (TSN) and its six metabolites *in vitro*.

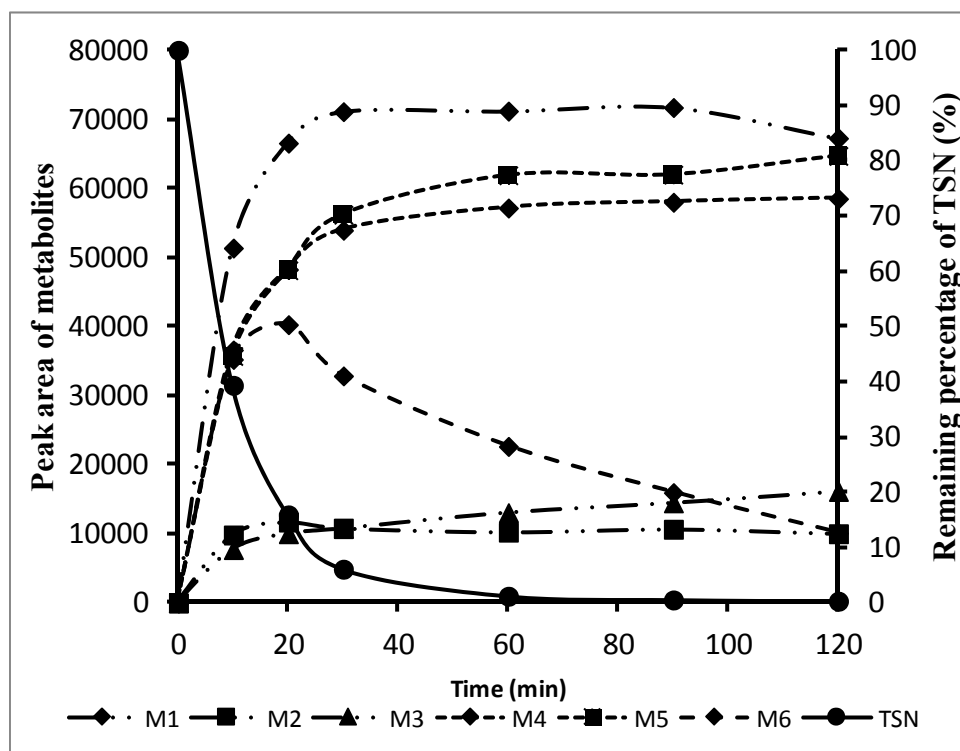

**Figure S3.** MS/MS spectra of metabolites *in vitro*, M1 (A), M2 (B), M3 (C), M4 (E), M5 (F), and M6 (G) at CE of 20 eV and M3 at CE of 30 eV (D).

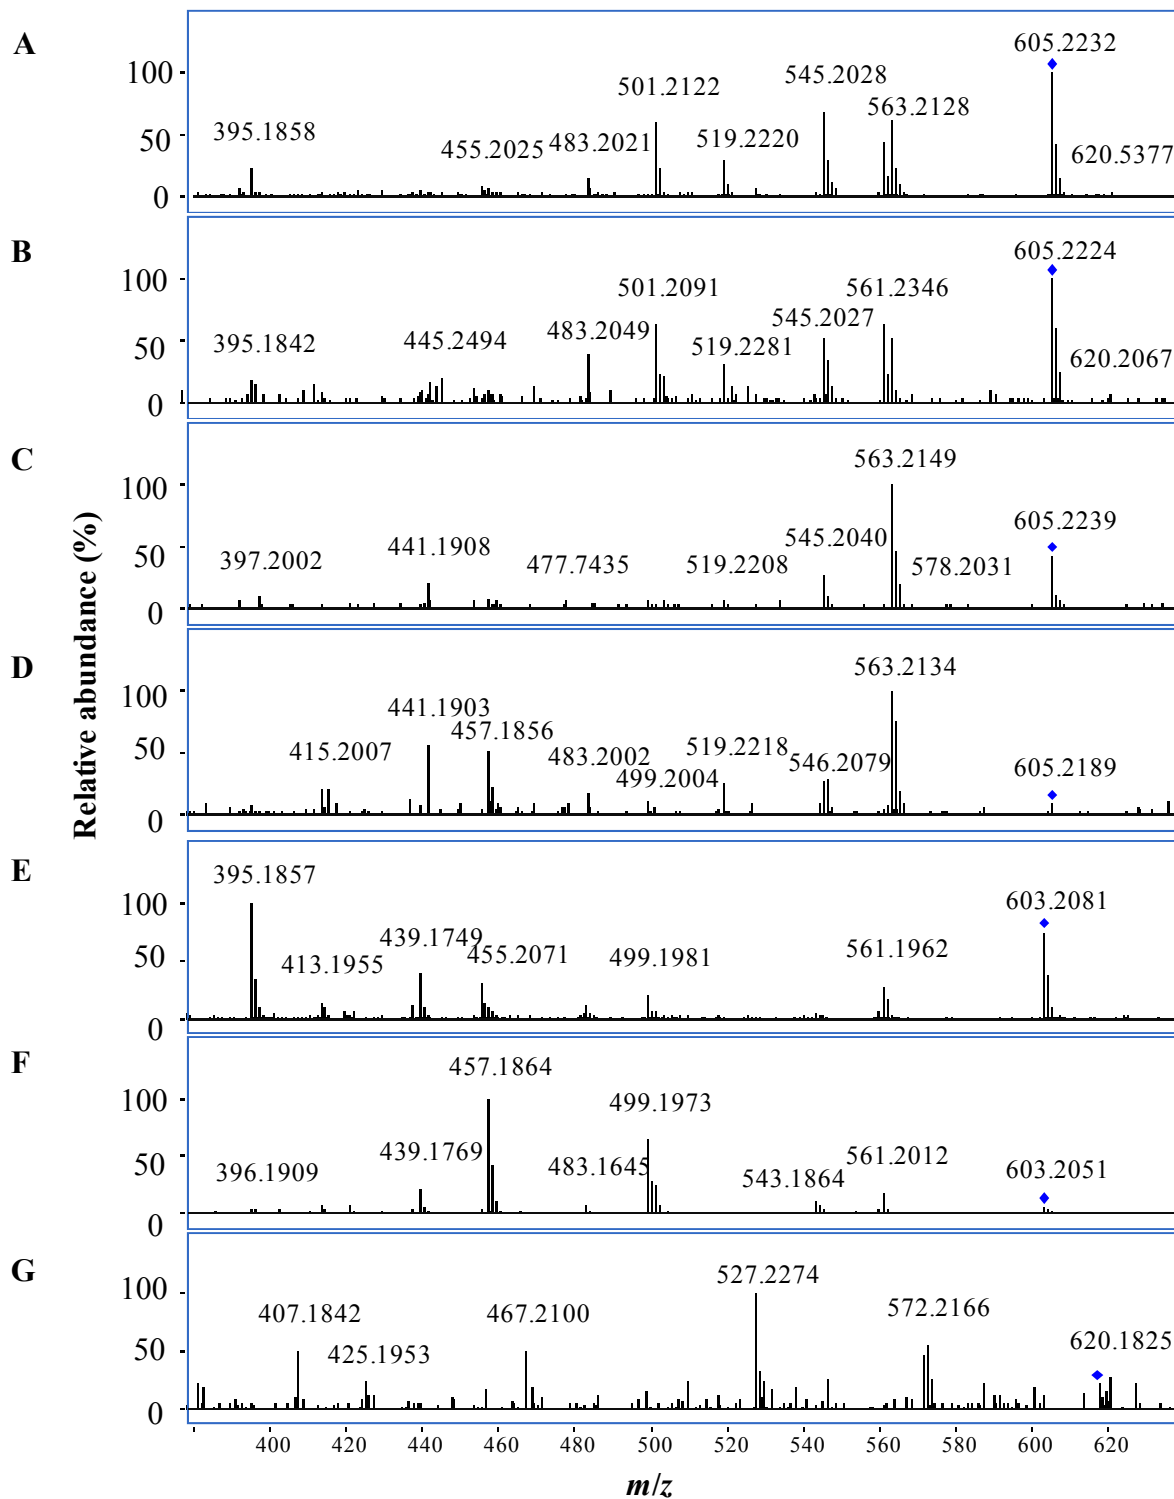

Supplement: s1 [file s1]
